# Supplementary material
Source: PubMed Central journal article supplement (PMC7965573)
Supplement: 3123_materials.pdf [file 3123_materials.pdf]

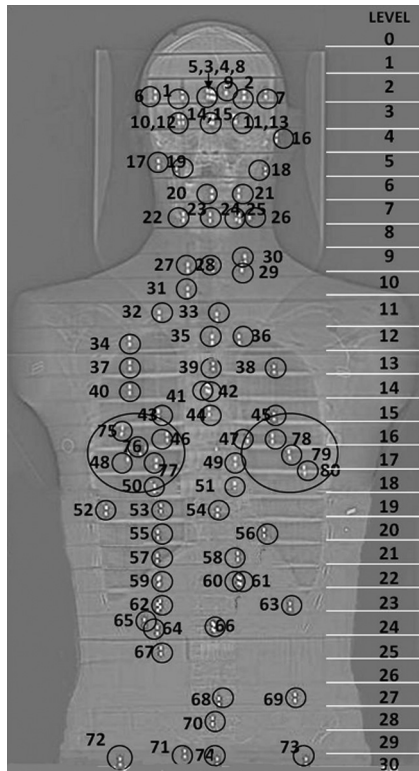

**On-line Fig 1.** The numbered levels and positions correspond to RPL dosimeter (bright rods) sites identified in On-line Table 1.

**On-line Table 1. Location of the RPL dosimeters in phantom**

| Organ or Tissue                    | Phantom Level                                                      | Position of<br>Numbered Dosimeters    | ICRP 60 <sup>h</sup>   | ICRP 103 <sup>i</sup>  |
|------------------------------------|--------------------------------------------------------------------|---------------------------------------|------------------------|------------------------|
|                                    |                                                                    |                                       | W <sub>T</sub><br>0.12 | W <sub>T</sub><br>0.12 |
| Active bone marrow <sup>a</sup>    |                                                                    |                                       |                        |                        |
| Mandible body (dex, sin)           | 7                                                                  | 22, 24                                |                        |                        |
| Calvaria (post, dex, sin, ant)     | 2                                                                  | 5, 6, 7, 8                            |                        |                        |
| Cervical vertebrae C1-C5           | 6                                                                  | 20                                    |                        |                        |
| All thoracic vertebrae             | 11, 19                                                             | 33, 54                                |                        |                        |
| Clavicles                          | 11                                                                 | 32                                    |                        |                        |
| Sternum + ribs                     | 14, 15, 19                                                         | 42, 44, 52                            |                        |                        |
| Lumbar vertebrae L1-L4             | 27                                                                 | 68                                    |                        |                        |
| Sacrum                             | 30                                                                 | 71                                    |                        |                        |
| Breast dex                         | 16, 18                                                             | 75, 77                                | 0.05                   | 0.12                   |
| Breast sin                         | 16, 18                                                             | 78, 80                                |                        |                        |
| Colon <sup>b</sup>                 |                                                                    |                                       | 0.12                   | 0.12                   |
| Upper large intestine              | 24, 25                                                             | 64, 66, 67                            |                        |                        |
| Lower large intestine              | 27                                                                 | 69                                    |                        |                        |
| Lung dex                           | 12, 13, 14, 15, 16, 17, 18                                         | 34, 37, 40, 43, 46, 48, 50            | 0.12                   | 0.12                   |
| Lung sin                           | 13, 15                                                             | 38, 45                                |                        |                        |
| Stomach                            | 20, 21, 22, 23                                                     | 56, 58, 61, 63                        | 0.12                   | 0.12                   |
| Ovaries (female gonads)            | 30                                                                 | 72, 73                                | 0.20                   | 0.08                   |
| Liver                              | 19, 20, 21, 22                                                     | 53, 55, 57, 59                        | 0.05                   | 0.04                   |
| Esophagus                          | 9, 12, 14                                                          | 28, 35, 41                            | 0.05                   | 0.04                   |
| Thyroid                            | 9, 10                                                              | 27, 29, 31                            | 0.05                   | 0.04                   |
| Urinary bladder                    | -                                                                  |                                       | 0.05                   | 0.04                   |
| Brain                              |                                                                    |                                       | r                      | 0.01                   |
| Midbrain                           | 2, 3                                                               | 3, 4, 14, 15                          |                        |                        |
| (ant, dex, post, sin)              | 2                                                                  | 1, 2                                  |                        |                        |
| Bone surface <sup>c</sup>          | See active bone marrow                                             | See active bone marrow                | 0.01                   | 0.01                   |
| Salivary glands                    | 5, 7                                                               | 17, 23, 25                            | -                      | 0.01                   |
| Skin <sup>d</sup>                  | 2, 3, 4, 5, 7, 9, 13, 17                                           | 9, 10, 11, 16, 19, 26, 30, 39, 76, 79 | 0.01                   | 0.01                   |
| Adrenals                           | 23                                                                 | 62                                    | r                      | 0.12/13                |
| Extrathoracic airways <sup>e</sup> | 6, 7, 9                                                            | 21, 23, 28                            | r                      | 0.12/13                |
| Gallbladder                        | 22                                                                 | 59                                    | -                      | 0.12/13                |
| Heart                              | 16, 17, 18                                                         | 47, 49, 50                            | -                      | 0.12/13                |
| Kidneys                            | 23, 24                                                             | 62, 65                                | r                      | 0.12/13                |
| Lymph nodes <sup>f</sup>           | 6, 7, 9, 10, 12, 13, 14, 15, 16, 17, 18,<br>20, 21, 22, 23, 24, 30 | Comments <sup>f</sup>                 | -                      | 0.12/13                |
| Muscle <sup>g</sup>                | 3, 5, 6, 7, 9, 12                                                  | 12, 13, 17, 20, 23, 28, 35            | r                      | 0.12/13                |
| Oral mucosa                        | 6                                                                  | 21                                    | -                      | 0.12/13                |
| Pancreas                           | 24                                                                 | 64                                    | r                      | 0.12/13                |
| Small intestine                    | 27                                                                 | 70                                    | r                      | 0.12/13                |
| Spleen                             | 22                                                                 | 60                                    | r                      | 0.12/13                |
| Thymus                             | 12                                                                 | 36                                    | r                      | 0.12/13                |
| Uterus                             | 30                                                                 | 74                                    | r                      | 0.12/13                |

**Note:**—ant, indicates anterior; dex, dexter; post, posterior; sin, sinister; lat, lateral.

<sup>a</sup> The dose for active bone marrow was calculated by using the sum of the individual weighted doses based on the distribution of active bone marrow throughout the adult body D(active bone marrow) = 0.28\*D(mandible body) + 0.056\*D(calvaria) + 0.027\*D (cervical vertebrae)+ 0.17\*D(thoracic vertebrae) + 0.008\*D(clavicles)+0.192\*D(ribs+sternum)+0.098\*D(lumbar vertebrae)+0.333\*D(sacrum).<sup>16</sup>

<sup>b</sup> The dose in colon was calculated according to ICRP Publication 67 from formula D(colon) = 0.57\*D(ULI) + 0.43\*D(LLI). D(ULI) is the average dose of the ascending and transverse colon and D(LLI) is that of the descending colon.<sup>17</sup>

<sup>c</sup> Bone surface dose was calculated by multiplying active bone marrow dose with 4.64.<sup>18</sup>

<sup>d</sup> Skin surface dose was determined by calculating the mean dose of 10 detection points; breast (sin, dex), midline shoulder, thyroid (sin), neck (sin), cheek (dex), head (lat sin), head (back), lens of the eye. The dose to the skin was estimated 5%<sup>18</sup> in cerebral acquisition and 15% in cervicocerebral acquisition of the whole body skin.

<sup>e</sup> Nasal sinuses, trachea, and pharynx were used to represent the extrathoracic airways.<sup>19</sup>

<sup>f</sup> The dose in lymphatic nodes was calculated as a weighted average of several surrogate organs from formula D (lymph nodes) = 0.13\*D(extra thoracic airways) + 0.08\*D(salivary glands) + 0.05\*D(thyroid) + 0.04\*D(esophagus) + 0.03\*D(stomach) + 0.15\*D(pancreas) + 0.10\*D(gallbladder) + 0.07\*D(lungs) + 0.05\*D(total body) + 0.04\*D(heart) + 0.25\*D(small intestine) + 0.01\*D(gonads).<sup>19</sup>

<sup>g</sup> The dose in muscles was determined from the doses in surrogate organs: Left and right orbit, parotid dexter, center cervical spine, sublingual gland, and esophagus. The dose to the muscles was estimated 5% of the whole body muscles.<sup>18</sup>

<sup>h</sup> Weighting factors labelled as "r" mean remainder tissues of ICRP Publication 60. The organs labelled as "-" are not included in the calculation of the ICRP 60. The tissue weighted factor of the ICRP 60 is 0.05 and is applied to the mass-averaged dose in the remainder organs and tissues. Tissue weighted factor 0.025 is applied to a remainder organ, if it receives a dose that is higher than the dose to any 12 organs that are not included in remainder organs and have their own tissue weighting factor. The rest of the weighting factor, 0.025, is applied to the mass-averaged dose in the other remainder organs and tissues.<sup>20</sup>

<sup>i</sup> The weighting factors that are shown as the fraction 0.12/13 represent the remainder organ of the ICRP Publication 103. The new weighting factor 0.12 is applied to the arithmetic average dose in the remainder organs and tissues.<sup>21</sup>

**On-line Table 2: Calibration accuracy for dose measurement equipment**

| Characteristics of the Dosimeters | Calibration of GD-352M dosimeter against an Ionization Chamber in this Study           | Calibration of Ionization Chamber Model 9015 with Beam Chamber, Model 10 × 6–6 | Calibration of DAP Meter for Integris Allura Imaging Equipment                     |
|-----------------------------------|----------------------------------------------------------------------------------------|--------------------------------------------------------------------------------|------------------------------------------------------------------------------------|
| Linearity range                   | 20 $\mu$ Gy–10 Gy ( $R^2 = 1$ )                                                        | 100 nGy–516 Gy                                                                 |                                                                                    |
| Detection threshold               | 20 $\mu$ Gy (CV% = 12.2%)                                                              | 100 nGy                                                                        |                                                                                    |
| Calibration accuracy              | 4.9% (1 mGy–11 mGy), 6% (20 $\mu$ Gy–11 mGy), using x-rays 90 kVp, 2.9 mmAl + 0.1 mmCu | $\pm$ 4% using x-rays 60 kVp and 2.8 mm Al HVL                                 | +8.2% using x-rays 77 kVp (frontal tube); +9.4% using x-rays 84 kVp (lateral tube) |
| Reproducibility                   | 0.3% after 10 repeated measurements                                                    | 1.8% after 3 repeated measurements (measured in present study)                 |                                                                                    |
| Energy response                   | 6% at maximum (75–125 keV), using x-rays, 2.9 mmAl + 0.1 mmCu                          | $\pm$ 5% (30 keV to 1.33 MeV)                                                  |                                                                                    |
| Stability                         | <0.8% fading at 25 days, at 20°C (< 15 mGy)                                            |                                                                                |                                                                                    |
| Angle dependence                  | Direction of the element: horizontal $\pm$ 3%                                          |                                                                                |                                                                                    |

**Note:**—Al indicates aluminum; Cu, copper; HVL, half-value layer.

**On-line Table 3: The mean equivalent doses  $H_T$  (mSv) and the effective doses  $E$  (mSv) for diagnostic cerebral and cervicocerebral angiography examinations**

| Protocols                       | 1) CTA with AEC  | 2) CTA without AEC      | 1) DSA with AEC        | 2) DSA with AEC         |
|---------------------------------|------------------|-------------------------|------------------------|-------------------------|
| Organ or tissue                 | Cerebral vessels | Cervicocerebral vessels | Cerebral vessels       | Cervicocerebral vessels |
| Active bone marrow (total)      | 1.12             | 5.38                    | 5.48                   | 6.24                    |
| Bone surface (total)            | 5.19             | 24.95                   | 25.40                  | 28.52                   |
| Brain                           | 9.41             | 16.90                   | 73.51                  | 51.81                   |
| Salivary glands                 | 4.71             | 20.40                   | 23.41                  | 35.60                   |
| Thyroid                         | 0.67             | 22.34                   | 3.46                   | 10.96                   |
| Esophagus                       | 0.66             | 18.94                   | 1.62                   | 4.40                    |
| Lung                            | 1.03             | 7.91                    | 0.68                   | 1.41                    |
| Stomach                         | 0.08             | 0.52                    | 0.06                   | 0.10                    |
| Colon                           | 0.01             | 0.13                    | 0.01                   | 0.03                    |
| Liver                           | 0.15             | 0.87                    | 0.11                   | 0.18                    |
| Breasts                         | 0.33             | 1.73                    | 0.18                   | 0.27                    |
| Extra thoracic airway           | 2.83             | 20.94                   | 13.34                  | 28.97                   |
| Oral mucosa                     | 5.95             | 20.53                   | 31.13                  | 42.61                   |
| Lymph nodes                     | 1.05             | 7.07                    | 4.58                   | 8.20                    |
| Thymus                          | 0.53             | 14.67                   | 1.66                   | 5.10                    |
| Heart                           | 0.54             | 3.27                    | 0.32                   | 0.57                    |
| Gonads                          | —                | 0.03                    | —                      | —                       |
| Skin (total)                    | 0.42             | 2.24                    | 2.61                   | 4.62                    |
| Skin (highest dose)             | 10.19            | 25.17                   | 166.22                 | 97.97                   |
| Eyes (lens)                     | 9.13             | 14.45                   | 6.86                   | 5.39                    |
| Eyes (orbit)                    | 9.91             | 14.61                   | 21.84                  | 18.09                   |
| Effective doses (mSv):          |                  |                         |                        |                         |
| ICRP 60                         | 0.66             | 4.24                    | 3.16                   | 3.40                    |
| ICRP 103                        | 0.67             | 4.85                    | 2.71                   | 3.60                    |
| DAP (Gy-cm <sup>2</sup> )       |                  |                         | 48.7                   | 50.7                    |
| DLP (mGy-cm)                    | 262              | 495                     |                        |                         |
| CTDI (mGy)                      | 14.1             | 12.3                    |                        |                         |
| Conversion factors <sup>a</sup> | mSv/mGy-cm       | mSv/mGy-cm              | mSv/Gy-cm <sup>2</sup> | mSv/Gy-cm <sup>2</sup>  |
| ICRP 60                         | 0.0025           | 0.0086                  | 0.065                  | 0.067                   |
| ICRP 103                        | 0.0026           | 0.0098                  | 0.056                  | 0.071                   |

**Note:** — Indicates that the dose is under the detectable range; DAP, dose-area product; CTDI, CT dose index;  $H_T$  = equivalent dose.

<sup>a</sup> Effective dose divided by DAP or DLP unit.
